# Supplementary material
Source: PubMed Central journal article supplement (PMC4259262)

Graphical Abstract:

## Optimization of the anti-cancer activity of phosphatidylinositol-3 kinase pathway inhibitor PITENIN-1: switching a thiourea with 1,2,3-triazole

Y. Kommagalla, S. Cornea, R. Riehle, V. Torchilin, A. Degterev and C.V. Ramana

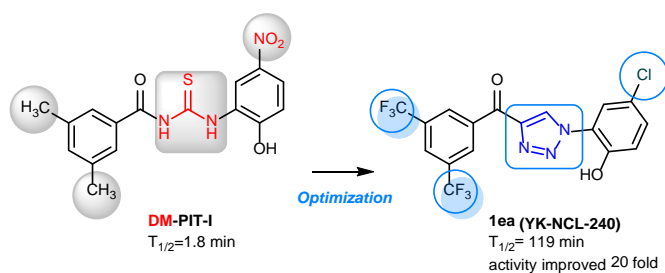

Supplement: NIHMS611331-supplement-Graphical_Abstract.pdf [file NIHMS611331-supplement-Graphical_Abstract.pdf]
